# Supplementary material for: Oxidized LDL Is Strictly Limited to Hyperthyroidism Irrespective of Fat Feeding in Female Sprague Dawley Rats
Source: PubMed Central journal article supplement (PMC4463724; doi:10.3390/ijms160511689), 2015-05-21
Supplement: ijms-16-11689-s001.pdf [file ijms-16-11689-s001.pdf]

## Supplementary Information

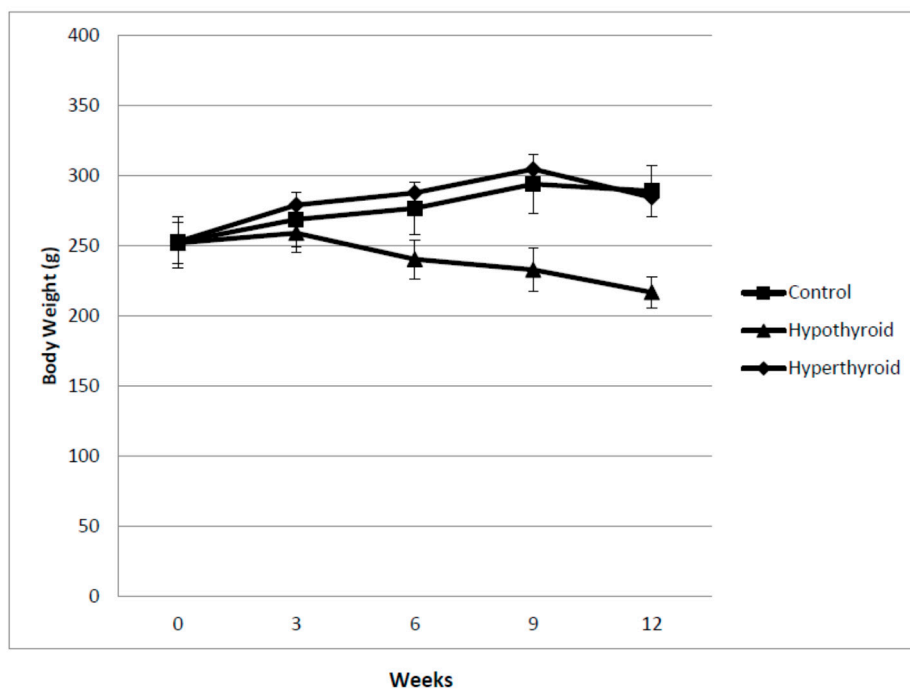

(A)

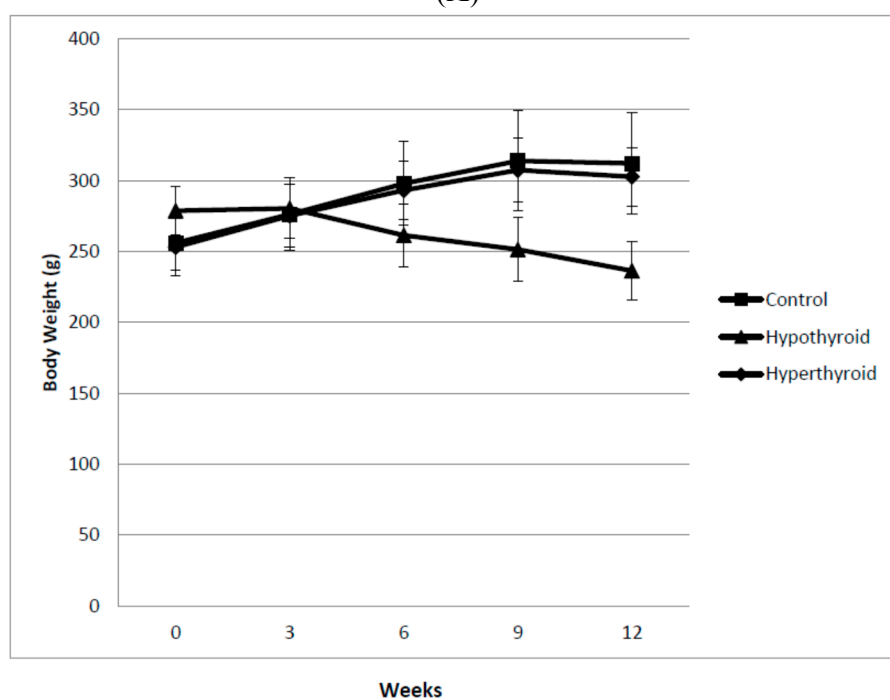

(B)

**Figure S1.** Body weight changes under (A) normal diet and (B) high fat diet.
